# Supplementary material for: Elderly patients with non-specific complaints at the emergency department have a high risk for admission and 30-days mortality
Source: Springer Nature journal article supplement (doi:10.1186/s12877-023-04621-7), 2024-01-03
Supplement: MOESM1 [file 26588888]

Appendix for “Elderly patients with non-specific complaints at the Emergency Department have a high risk for admission and 30-days mortality”

Appendix 1. Describes diagnostic groups categorized according to the International Classification of Disease-10 (ICD-10).

| Diagnostic group      | ICD-10                          |
|-----------------------|---------------------------------|
| Hypertension          | I10-I15                         |
| IHD                   | I20-I25                         |
| AF                    | I48                             |
| HF                    | I50                             |
| CVI                   | I60-I69                         |
| DM                    | E10-E14                         |
| COPD                  | J43-J45                         |
| Musculoskeletal pain  | M05-M06, M15-M19, M54, M48, M79 |
| Psychiatric disorders | F00-F03, F10-F48, R54, G30      |
| Malignancy            | C00-C97                         |

Note; IHD = ischemic heart disease, AF = atrial fibrillation, HF = heart failure, CVI = cerebrovascular insult, DM = diabetes mellitus, COPD = chronic obstructive pulmonary disease.
